# Supplementary material for: Scotland's Forgotten Carbon: A National Assessment of Mid-Latitude Fjord Sedimentary Carbon Stocks
Source: Copernicus journal article supplement (doi:10.5194/bg-2017-360), 2017-08-25
Supplement: Supplementary file [file bg-2017-360-AC1-supplement.zip]

# Scotland's Forgotten Carbon: A National Assessment of Mid-Latitude Fjord Sedimentary Carbon Stocks.

Craig Smeaton <sup>1,\*</sup>, William E.N. Austin <sup>1,2</sup>, Althea L. Davies <sup>1</sup>, Agnes Baltzer <sup>3</sup>, John A. Howe <sup>2</sup> and John M. Baxter <sup>4</sup>.

<sup>1</sup> School of Geography & Geosciences, University of St Andrews, St Andrews, KY16 9AL, UK

<sup>2</sup> Scottish Association for Marine Science, Scottish Marine Institute, Oban, PA37 1QA, UK

<sup>3</sup> Institut de Géographie et d'Aménagement Régional de l'Université de Nantes, BP 81 227 44312 Nantes CEDEX 3, France.

<sup>4</sup> Scottish Natural Heritage, Silvan House, Edinburgh, EH12 7AT, UK

Formatted: English (United Kingdom)

## \*Corresponding Author.

Email address: [cs244@st-andrews.ac.uk](mailto:cs244@st-andrews.ac.uk) (Craig Smeaton)

## Highlights:

- Scottish fjords are a more effective store of C than the terrestrial environment.
- A total of  $640.7 \pm 46$  Mt C is stored in the sediment of Scotland's 111 fjords.
- An estimated  $31139\text{--}40615$  t yr<sup>-1</sup> C is buried in the sediment of Scotland's fjords.
- Fjord sediments are potentially the most effective store of C globally.

## Abstract

Fjords are recognised as hotspots for the burial and long-term storage of carbon (C) and potentially provide a significant climate regulation service over multiple timescales. Understanding the magnitude of marine sedimentary C stores and the processes which govern their development is fundamental to understanding the role of the coastal ocean in the global C cycle. In this study, we use the mid-latitude fjords of Scotland as a natural laboratory to further develop methods to quantify these marine sedimentary C stores at both the individual fjord and national scale. Targeted geophysical and geochemical analysis has allowed the quantification of sedimentary C stocks for a number of mid-latitude fjords and, coupled with upscaling techniques based on fjord classification, has generated the first full national sedimentary C inventory for a fjordic system. The sediments within these mid-latitude fjords hold  $640.7 \pm 46$  Mt of C split between  $295.6 \pm 52$  and  $345.1 \pm 39$  Mt of organic and inorganic C respectively. When compared, these marine mid-latitude sedimentary C stores are of similar magnitude to their terrestrial equivalents, with the exception of the Scottish peatlands, which hold significantly more C. However, when area-normalised comparisons are made, these mid-latitude fjords are significantly more effective as C stores than their terrestrial counterparts, including Scottish peatlands. The C held within Scotland's coastal marine sediments has been largely overlooked as a significant component of the nation's natural capital; such coastal C stores are likely to be key to understanding and constraining improved global C budgets.

67

## 68 **1. Introduction**

69 Globally there is growing recognition that the burial (Smith et al., 2015) and storage  
70 (Smeaton et al., 2016) of carbon (C) in coastal marine sediments is an important factor in the  
71 global carbon cycle (Bauer et al. 2013), as well as providing an essential climate regulating  
72 service (Smith et al. 2015). Coastal sediments have been shown to be globally significant  
73 repositories for C, with an estimated 126.2 Mt of C being buried annually (Duarte et al.,  
74 2005). Of the different coastal depositional environments, fjords have been shown to be  
75 'hotspots' for C burial, with approximately 11 % of the annual global marine carbon  
76 sequestration occurring within fjordic environments (Smith et al., 2015). Although it is clear  
77 these areas are important for the burial and long-term storage of C, the actual quantity of C  
78 held within coastal sediment remains largely unaccounted for. This knowledge deficit hinders  
79 our ability to fully evaluate, manage and protect these coastal C stores and the climate-  
80 regulating service that they provide.

81 The quantification of C in fjordic sediments was identified as a priority by Syvitski et al.  
82 (1987), but little progress has been made towards this goal until recently. Our work presented  
83 here utilises and extends the joint geochemistry and geophysical methodology developed by  
84 Smeaton et al. (2016) by applying it to a number of mid-latitude fjords. Estimated  
85 sedimentary C stocks for individual fjords will be utilised to create the first national estimate  
86 of sedimentary C stocks in the coastal ocean and thus quantify an overlooked aspect of  
87 Scotland's natural capital.

## 88 **2. Scotland's Fjords**

89 The coastal landscape of the west coast and islands of Scotland is dominated by fjordic  
90 geomorphology (Cage and Austin, 2010; Nørgaard-Pedersen et al., 2006). Catchments  
91 totalling an area of 21,742 km<sup>2</sup> drain to the sea through fjords, thus transporting sediment  
92 from the C rich soils into the marine system (Bradley et al., 2005). There are 111 large fjords  
93 (over 2 km long, where fjord length is twice fjord width) (Fig.1) in Scotland (Edwards and  
94 Sharples, 1986), supplemented by a further 115 smaller systems. The 111 large fjords are the  
95 primary focus of this study because their size and heavily glaciated geomorphology (Howe et  
96 al., 2002) suggest they are likely to store significant quantities of postglacial sediment.  
97 Additionally, geomorphological and oceanographic datasets are readily available for these  
98 fjords.

99 Building on the work of Smeaton et al. (2016), which centred on Loch Sunart (56.705556, -  
100 5.737534), we focus on a further four fjords to develop site specific sedimentary C stock  
101 estimations, which then allow us to make more precise estimates for the same range of fjordic  
102 system types in Scotland. The chosen sites are Loch Etive (56.459224, -5.311151), Loch  
103 Creran (56.536970, -5.324578), Loch Broom (57.873974, -5.117443) and Little Loch Broom  
104 (57.872144, -5.316385)(Fig.1). These fjords differ significantly in their physical  
105 characteristics (Table 1) and bottom water oxygen conditions. Hypoxic bottom water

conditions are recognised as an important factor in C burial and preservation within depositional coastal environments (Middelburg and Levin, 2009; Woulds et al., 2007). However of these, 111 fjords, only Loch Etive's upper basin is known to be permanently hypoxic (Friedrich et al., 2014). Modelling of deep water renewal in the 111 fjords suggests that between 5 and 28 fjords, including Loch Broom and Little Loch Broom, could experience intermittent periods of hypoxia, while this is less likely in Lochs Sunart and Creran (Gillibrand et al., 2005, 2006). [The geology of the West coast of Scotland is dominated by metamorphic and igneous rocks resulting in minimal input potential from petrogenic/fossil and inorganic carbon sources.](#)

### 3. Towards A National Fjordic Sedimentary Carbon Inventory

#### 3.1. Sample and Data Collection

This study applies the methodology of Smeaton et al. (2016) where sediment cores and seismic geophysical data were collected to four additional fjords. Figure. 1 shows the location of each of the long (>1 m) sediment cores extracted from the four fjords chosen to produce detailed sedimentary C stock estimates. With the exception of Loch Creran, where the required data were extracted from the available literature (Cronin and Tyler. 1980, Loh et al., 2008), each core was subsampled at 10 cm intervals for analysis. In total, 285 subsamples were collected from the sediment cores from Loch Etive (n= 133), Loch Broom (n= 78) and Little Loch Broom (n= 74). The data produced by Smeaton et al. (2016) for the glacially derived sediment in Loch Sunart were used as a surrogate for all glacial sediments in this study since MD04-2833 remains the only mid-latitude fjord core with chronologically constrained glacial sediment (Baltzer et al. 2010). Detailed seabed seismic geophysical data for Loch Etive (Howe et al., 2002) , Loch Creran (Mokeddem et al., 2015), Loch Broom (Stoker and Bradwell, 2009) and Little Loch Broom (Stoker et al. 2010) was compiled.

In addition, sediment surface samples (n= 61) and partial seismic surveys (n=5) have been collected from a number of additional fjords (Fig.1). These, in conjunction with data from the literature (Russell et al., 2010, Webster et al., 2004), provide a greater understanding of C abundance in these sediments and assist in constraining upscaling efforts. The full dataset is presented in the supplementary material.

#### 3.2. Analytical Methods

Each of the subsamples was split for physical and geochemical analyses. The dry bulk density (DBD) of the sediment was calculated following Dadey et al. (1992). All samples were freeze dried, milled and analysed for total carbon (TC) and nitrogen (N) using a Costech elemental analysis (EA) (Verardo et al., 1990). Sub-samples of the same samples then underwent carbonate removal through acid fumigation (Harris et al., 2001) and were analysed by EA to quantify the organic carbon (OC) content. The inorganic carbon (IC) content of the sediment was calculated by deducting the OC from the TC. Analytical precision was estimated from repeat analysis of standard reference material B2178 (Medium Organic

144 content standard from Elemental Microanalysis, UK) with C = 0.08 % and N = 0.02 % (n =  
145 40).

### 146 3.3. *Fjord Specific Sedimentary Carbon Inventories*

147 Following the methodology of Smeaton et al. (2016), the geochemical and seismic  
148 geophysical data were combined to make first order estimates of the C held in the postglacial  
149 and glacial sediments of Loch Etive, Creran, Broom and Little Loch Broom. We then  
150 calculated how effectively the fjord stores C ( $C_{eff}$ ) as a depth-integrated average value per  
151 km<sup>2</sup> for both the postglacial and glacial-derived sediments. Unlike Loch Sunart, where the  
152 sediment stratigraphy has robust chronological constraints (Cage and Austin, 2010; Smeaton  
153 et al., 2016), the four other fjords largely lack chronological evidence, with the exception of  
154 two cores from Loch Etive (Howe et al., 2002; Nørgaard-Pedersen et al., 2006). The lack of  
155 <sup>14</sup>C dating means we rely solely on the interpretation of the seismic geophysics to  
156 differentiate between the postglacial and glacial sediments. To ensure the consistency of this  
157 approach, previous seismic interpretations of Scottish fjordic sediments (Baltzer et al., 2010;  
158 Dix and Duck, 2000; Howe et al., 2002, Stoker and Bradwell, 2009, Stoker et al. 2010) were  
159 studied and a catalogue of different seismic facies compiled for use as a reference guide  
160 (Supplementary Material). Finally, we applied the framework set out in Smeaton et al. (2016)  
161 to reduce uncertainty in the interpretation of the seismic geophysics by testing seismic units  
162 against available dated sediment cores.

### 163 3.4. *Upscaling to a National Sedimentary Carbon Inventory*

164 Upscaling from individual to national coastal C estimates was key objective of this work.  
165 Two approaches were developed to upscale the five detailed sedimentary C inventories to a  
166 national scale stock assessment of C in the sediment of the 111 major Scottish fjords. Both  
167 approaches utilise the physical characteristics of the fjords to quantify the OC and IC held  
168 within the sediment. From these data we can also estimate the long-term average quantity of  
169 C buried each year. Currently the best estimate of when the west coast of Scotland was free  
170 of ice from the last glacial period is approximately 13.5 ka (Lambeck, 1993) though it could  
171 be argued that 15 ka or 11.5 ka BP would be more appropriate. Modelling of the retreat of  
172 the last ice sheet (Clark et al., 2012) suggests that a significant number of the fjords would  
173 have been ice free around 15 ka (Supplementary Material) and have the ability to start  
174 accumulating C. Alternatively 11.5 ka (Golledge, 2009) could be used as this date signifies  
175 the point the fjords became permanently ice free after the loss of ice associated with the  
176 Younger Dryas period. By dividing the total C held within the postglacial sediment in all the  
177 fjords by this range of dates we can calculate the long-term average quantity of C buried per  
178 year since the start of the postglacial period. Although the methodology is relatively crude  
179 and probably underestimates the quantity of C being buried each year, it does give a valuable  
180 first order insight into the long-term carbon sequestration service that fjords provide.

#### 181 3.4.1. *Fjord Classification Approach*

182 The first stage of upscaling involves grouping the 111 fjords using the physical  
 183 characteristics identified in (Table. 1), along with rainfall, tidal range and runoff data.  
 184 Grouping was achieved by applying a k-means cluster analysis ( $1 \times 10^5$  iterations) to all 111  
 185 fjords (Edwards and Sharples, 1986). This resulted in the delineation of four groups (Fig.2).  
 186 Group 1 comprises mainly mainland fjords which are the most deeply glaciated and have  
 187 highly restrictive submarine geomorphology (Gillibrand et al., 2005); Loch Sunart and  
 188 Creran fall into this category. Group 2 contains fjords from the mainland and the Inner  
 189 Hebrides which tend to be less deeply glaciated and more open systems; Loch Broom and  
 190 Little Loch Broom are part of this group. Group 3 includes the fjords on Shetland and the  
 191 Outer Hebrides; these fjords are shallower and their catchments tend to be smaller and  
 192 noticeably less glaciated. Group 4 consists of Loch Etive and Loch Linnhe; these fjords are  
 193 outliers from the other groups and both have extremely large catchments in comparison to the  
 194 others and were major glacial conduits for ice draining the central Scottish ice field at the last  
 195 glacial period. This analysis suggest the level to which the fjords are glaciated is a defining  
 196 factor to how they are classified. When mapped the ice thickness at the last glacial maximum  
 197 (Lambeck et al. 1993) largely correlates with the groupings produced by the k-means analysis  
 198 (Supplementary Material) with Group 1 under the maximum amount of ice, which reduces in  
 199 thickness for each subsequent group. Our case study fjords are thus representative of three of  
 200 the fjordic groups that can be recognised at a national scale. Group specific postglacial and  
 201 glacial  $OC_{eff}$  and  $IC_{eff}$  were calculated using the data from the detailed sedimentary C  
 202 inventories available from our five sites. The Group specific  $OC_{eff}$  and  $IC_{eff}$  were applied to  
 203 each fjord within a group, giving the total OC and IC stock for each fjord. Group 3 does not  
 204 contain any of the five fjords for which there are detailed C stock estimations and Group 2  
 205 has therefore been chosen as a surrogate since the k-mean analysis indicate that Groups 2 and  
 206 3 have the greatest similarities.

#### 207 3.4.2. Physical Attribute Approach

208 The physical characteristics of fjords (Table 1) have primarily governed the input of C into  
 209 the fjord since the end of the last glaciation (McIntyre and Howe, 2010), when the majority of  
 210 fjords became ice-free. We might therefore expect a relationship between the physical  
 211 features of a given fjord and its accompanying catchment, and the C stored in its sediments.  
 212 We use detailed sedimentary C stock estimations in conjunction with the physical  
 213 characteristics (Edwards and Sharples, 1986) to determine which physical feature best  
 214 correlates with the quantity of OC and IC held in the sediment. A statistical scoping exercise  
 215 was therefore undertaken to determine which physical characteristics are best suited to the  
 216 upscaling process (Supplementary Material). The results indicate that there are strong linear  
 217 relationships between  $OC_{eff}$  and tidal range ( $p = 0.012$ ,  $R^2 = 0.909$ ), precipitation ( $p = 0.003$ ,  
 218  $R^2 = 0.961$ ), catchment area ( $p = 0.023$ ,  $R^2 = 0.860$ ) and runoff ( $p = 0.019$ ,  $R^2 = 0.877$ ). The  
 219 correlation between these physical features and OC content fits well with our understanding  
 220 of fjord processes, since tidal range is a proxy for the geomorphological restrictiveness of the  
 221 fjord, while catchment size, precipitation and runoff govern the input of terrestrially-derived  
 222 OC (Cui et al., 2016) into the fjord. The relationship between the IC stored in the sediment

223 and a fjord's physical characteristics is less well-defined, with strong correlations identified  
224 between IC and the area of the fjord ( $p = 0.009$ ,  $R^2 = 0.925$ ) and the length of the fjord ( $p =$   
225  $0.016$ ,  $R^2 = 0.892$ ). Again, this fits with what we would expect: the larger/longer the fjord,  
226 the greater the opportunity for in-situ IC production (Atamanchuk et al., 2015) and  
227 remineralisation of OC (Bianchi et al., 2016). Each of these relationships were used to  
228 calculate the OC and IC stored in the postglacial sediment of each of the 111 fjords. The  
229 input of glacially-derived OC during the retreat of the ice sheet at approximately 13.5 ka -17  
230 ka (Clark et al., 2012) is controlled by a more sporadic mechanisms (Brazier et al. 1988)  
231 governed by complex advance-retreat ice margin dynamics during the deglaciation. This  
232 approach is therefore not suitable for estimating the C stored in the glacial sediment of the  
233 fjords

#### 234 3.4.3. Constraining Estimates and Uncertainty

235 To determine the accuracy of both upscaling methodologies, we compared the total quantity  
236 of sedimentary OC and IC calculated for Lochs Sunart, Etive, Creran, Broom and Little Loch  
237 Broom by both upscaling approaches alongside detailed estimates of C held within the  
238 sediment of each of the five fjords. Although there are insufficient data to create additional  
239 detailed sedimentary C stock estimates at a national scale, there are enough data from some  
240 fjords to make broad estimations (Supplementary Data). Seismic geophysical data from  
241 Lochs Hourn (57.125683, -5.589578), Eriboll (58.497543, -4.685106), Fyne (55.882882, -  
242 5.381012), Nevis (57.007023, -5.693133) and Lower Loch Linnhe (56.591510, -5.456910)  
243 allow us to estimate the minimum and maximum depth of postglacial sediment, while surface  
244 sample data from each loch enables us to estimate C content of the sediment. Using these  
245 data we can calculate basic estimates of postglacial OC and IC held within the sediment of  
246 these fjords as an additional check on the accuracy of the upscaling methodology.

247 Two metrics of uncertainty were employed: arithmetic and a confidence-driven approach.  
248 The arithmetic method follows the approach of Smeaton et al. (2016), whereby any known  
249 arithmetic uncertainty is propagated through all the calculations. However, as recognised by  
250 Smeaton et al. (2016), there are 'known unknowns' which we cannot reliably quantify.  
251 Therefore we have further employed a confidence-driven approach to assess the final C stock  
252 estimations for each fjord. Using a modified confidence matrix (Fig.3) following the  
253 protocols adopted in the IPCC 5<sup>th</sup> Assessment (Mastrandrea et al., 2010), we have semi-  
254 quantitatively assigned a level of confidence to the C estimates from each fjord. The matrix  
255 uses the results from the k-means analysis and the availability of secondary data  
256 (Supplemental Material) to assign a confidence level. For example, as described above (3.4.1)  
257 a fjord in the Outer Hebrides would fall into Group 3. As discussed, this group is without a  
258 detailed sedimentary carbon inventory and no other data are available to test the calculated C  
259 inventory. In this case, the C stock estimation for that fjord would be assigned a very low  
260 confidence level. In contrast, if the fjord fell into to Group 1, where there are similar fjords  
261 with detailed C stock estimations and further C and partial geophysical data were available to  
262 test the calculated C inventory, then a high confidence level is assigned. The five fjords with

263 detailed sedimentary C inventories are the only sites, which have been assigned a confidence  
264 level of very high.

## 265 **4. Interpretation and Discussion**

### 266 *4.1. Fjord Specific Sedimentary Carbon Inventories*

267 Sedimentary analyses showed a broad similarity in dry bulk density values from the  
268 postglacial sediment of the five fjords, while the variability between the fjords is more clearly  
269 illustrated by the carbon [data-concentrations](#) (Fig.4). Lochs Broom, Sunart and Little Loch  
270 Broom are characterised by similar quantities of OC and IC. Although the TC content of the  
271 sediment in Loch Creran is comparable to the other fjords, the relative contribution of OC is  
272 higher, with a correspondingly lower quantity of IC in the sediment. Of the five lochs  
273 surveyed, the C content of Loch Etive's sediment is significantly different from the other  
274 sites. It has the highest TC content due to high quantities of OC found in the sediment. This is  
275 a possible consequence of hypoxic conditions in the inner basin, as discussed below. As  
276 expected, the highest dry bulk density values and lowest quantity of OC and IC occur in the  
277 glacial sediments at all sites.

278 The total C held within each of the five fjords (Table 2) was calculated by combining the  
279 bulk density data, % C and sediment volume models (Supplementary Material). Loch Sunart  
280 ( $26.9 \pm 0.5$  Mt C) contains the largest sedimentary C store of the five fjords, closely followed  
281 by Loch Etive ( $21.1 \pm 0.3$  Mt C). In comparison, Lochs Creran, Broom and Little Loch  
282 Broom hold significantly less C. As indicated above, the postglacial sediments of Loch Etive  
283 hold the greatest quantity of OC ( $11.5 \pm 0.4$  Mt) with 7.76 Mt of that OC held in the upper  
284 hypoxic basin resulting in Loch Etive being the most effective store of OC ( $0.455$  Mt OC km<sup>-2</sup>).  
285 These results suggest that low oxygen conditions inhibit reworking and remineralisation of  
286 organics and the production of carbonate fauna (Woulds et al. 2016). Loch Sunart has large  
287 sills (Smeaton et al. 2016) and is one of the largest fjords in Scotland; these features favour  
288 the [capture of terrestrial OC \(Smeaton and Austin, 2017\) and](#) storage of large quantities of  
289 post-glacial OC ( $9.4 \pm 0.2$  Mt) and IC ( $10.1 \pm 0.2$  Mt). The quantities of C stored in the  
290 sediment of the smaller fjords are strongly linked to how restrictive the geomorphology of the  
291 fjord is. For example, the smallest quantity of IC is held within Loch Creran. This is in part  
292 be due to the shallow and narrow central sill which results in a terrestrially dominated system  
293 with high sedimentation rates (Loh et al. 2008) which increases the OC storage effectiveness  
294 ( $0.195$  Mt OC km<sup>-2</sup>) but reduces the IC storage effectiveness ( $0.068$  Mt IC km<sup>-2</sup>) as increased  
295 humic acid input from terrestrial sources (Bauer and Bianchi. 2011) results in lower pH  
296 which in turn reduces the suitability of the fjord for calcifying organisms (Khanna et al. 2013).  
297 In contrast, the relatively unrestricted geomorphology of Loch Broom results in the fjord  
298 being governed by marine processes. [-The greater marine influence results in this ecosystem](#)  
299 [being capable of supporting a greater range and abundance of calcifying organisms \(e.g.](#)  
300 [foraminifera\) which creates which in turn make the sediments](#) a highly effective store of IC  
301  $0.232$  Mt IC km<sup>-2</sup>. ~~but in turn means~~ [In contrast](#) these open systems are comparatively poor at  
302 capturing OC as illustrated ~~by~~ Little loch Broom ( $1.6$  Mt OC). The glacial material



contains less C than the postglacial sediments. The effective storage of C in the glacially-derived sediments of the five fjords is very similar, with the  $OC_{eff}$  ranging between 0.030 to 0.093 Mt OC km<sup>-2</sup> and an  $IC_{eff}$  varying between 0.068 and 0.104 Mt IC km<sup>-2</sup> (Table 2). The similarity of these results may be because the mechanisms governing the deposition of glacial sediment during the retreat of the British Ice Sheet (Brazier et al. 1988) were similar across the geographic range of the fjords, but it may also be a product of limited data availability for the glacial sediment.

#### 4.2 A National Fjordic Sedimentary C Inventory

The results of the upscaling process (Table 3) suggest overall an estimated  $640.7 \pm 46$  Mt C are stored in fjordic sediments of Scotland, comprising  $295.6 \pm 52$  Mt OC and  $345.1 \pm 39$  Mt IC. The postglacial sediments are the main repository for much of this C, with almost equal amounts of OC and IC indicated by a OC:IC ratio of 1.17:1. In contrast, the glacial sediments are dominated by IC, with an OC:IC ratio of 0.33:1. This is most likely due to the glacial source material originating from scoured bedrock, and the absence of organic-rich soils and vegetation (Edwards and Whittington. 2010.). The storage of C is unevenly distributed between the 111 fjords; a small number of systems disproportionately contribute to the national sedimentary C total (Fig.5). The sediment of fourteen large fjords hold 65 % of the total C held Scotland's fjords (Table.4). Estimated C stocks for individual fjords can be found in the supplementary material.

In addition to quantifying the total C stored in these fjords, we also calculated the accuracy of the upscaling process (Supplementary Material) and assigned a confidence level to each of the sedimentary C estimates using the confidence matrix (Fig. 3). The availability of data for the postglacial sediment means that we have medium to very high confidence in our estimates of the quantity of OC and IC stored in 74 of the 111 fjords. The remaining 37 fjords have been assigned a low confidence level ~~of low~~, with most originating from Group 3 of the k-means analysis where we recognise a shortage of data needed to constrain C stock estimates. The lack of data for glacially-derived sediment results in all except the five case study lochs being assigned a confidence level of very low to medium. Using these checks we believe that our first order estimate of the C stored in the sediment of Scotland's fjords and the associated uncertainties are realistic and robust. However, we acknowledge that there is further scope to refine such estimates using multiple physical parameters that may, when tested with adequate ground-truthing data, yield improved C inventory estimates. The confidence level assigned to each fjordic C estimate stock can be found in the supplementary material.

##### 4.2.1 National Estimates of C Burial

Annually an estimated 31139- 40615 t of C is buried in the sediment of the 111 fjords, with OC contributing 16828 - 21949 t yr<sup>-1</sup> and IC supplying 14311 -18666 t yr<sup>-1</sup>. This annual burial of C has been suggested to provide a climate regulating service through C sequestration (Smith et al., 2015), yet efforts to fully quantify this mechanism have remained elusive. The results from this study indicate that fjords have been capturing OC since the

retreat of the last ice sheet some of which that would have otherwise been lost to the open ocean, where it would be more readily remineralized (Middelburg et al. 1993, Bianchi. 2011). Although the results do little to resolve the mechanisms that govern this climate regulating service, they clearly show that fjords have been providing this service since the retreat of the last ice sheet and throughout the Holocene. This suggests that these systems have the capacity to adapt to future changing environmental conditionschange. Intriguingly, there is also the possibility that this process may have aided the capture of terrestrial C during the late Holocene and recent past (Smeaton and Austin, 2017, submitted).

#### 4.2.2 Global Outlook

Given similarities between the mid-latitude fjords and coastal environments of New Zealand, Chile, Norway and Canada (Syvitski and Shaw, 1995), it is reasonable to suggest that our findings are relevant throughout these systems. The sediments within fjordic environments around the world potentially hold significant quantities of both OC and IC which have been overlooked in national and global carbon budgets. The joint geophysical and geochemical methodology used to quantify sedimentary C stocks coupled to the upscaling approach taken in this study is capable of providing nations around the world with the ability to quantify of their coastal sedimentary C stocks and reassess their nation's natural capital.

#### 4.3. Comparison to Other Mid-Latitude Carbon Stocks: significance and vulnerability

The  $640.7 \pm 46$  Mt of carbon held within the sediment of the fjords is one of the largest stores in Scotland (Fig.6). The fjordic sedimentary store is the largest of Scotland's coastal carbon stores (Burrows et al., 2014), exceeding both maerl and biogenic reefs which have been shown to be highly effective stores of both OC and IC (Van Der Heijden and Kamenos, 2015). In addition, fjord sediments hold a greater quantity of C than all the living vegetation in Scotland (Forestry Commission, 2015, Henrys et al., 2016, Vanguelova et al., 2013). While Scotland's soils (Aitkenhead and Coull, 2016) and in particular the peatlands (Chapman et al., 2009) contain a greater quantity of OC than the fjords, it must be remembered that the fjord sediments also hold IC and the areal extent of these stores differs greatly. When normalised by area (Fig.6), fjordic sediments emerge as a far more effective store of OC and IC than other Scottish C stores, on land or at sea.

Globally, there are no direct comparisons as this is the first national C inventory of marine sediments. Recent work in Denmark suggested that the Thurøbund seagrass meadow was one of the most effective stores of C in the world, storing  $0.027 \text{ Mt C km}^{-2}$  (Röhr et al., 2016). On an aerial basis, however, these seagrass meadows are significantly less effective than fjord sediments, which hold  $0.219 \text{ Mt OC km}^{-2}$  and  $0.256 \text{ Mt IC km}^{-2}$ . This disparity emerges because Röhr et al. (2016) only consider the top 0.25 m of seagrass sediment, while our study encompassed the full depth of sediment. In Loch Sunart, for example, sediment depths of 70 m have been recorded (Baltzer et al. 2010). When compared like for like (i.e. the top 0.25 m) the Thurøbund seagrass meadow is more effective at accumulating C, although questions

380 remain over the stability and longevity of these stores in comparison with the fjord sediments.  
381 This is a key concern when comparing C stores.

382 Radiocarbon dating (Nørgaard-Pedersen et al. 2006, Baltzer et al. 2010, Smeaton et al. 2016)  
383 shows that the fjords have been collecting sediment since the retreat of the last ice sheet  
384 (Clark et al. 2012), which results in these C stores likely being some of the oldest and most  
385 persistent in the UK. Of the terrestrial C stores, only soils and peatland have the potential to  
386 store C over similar timescales, but they are significantly more vulnerable to natural and  
387 anthropogenic disturbance than the fjordic sediments. Vegetation and soil C stores are at risk  
388 from rapid and long-term environmental change. These environments can lose significant  
389 quantities of C through soil erosion (Cummins et al. 2011), fire (Davies et al. 2013) and  
390 vegetation change (Jackson et al. 2002), disturbances which are increasing in regularity and  
391 severity with growing climatic and anthropogenic pressure. When we consider the marine  
392 sedimentary C stores through the same prism of environmental change, it is evident that the  
393 restricted geomorphology, water depth and relative remoteness of these stores affords them a  
394 level of protection not found in the terrestrial environment. However, this does not imply that  
395 coastal sedimentary C stores do not require careful management. For example, the  
396 remobilisation of C-rich sediments at the seafloor from direct physical disturbance poses an  
397 increased risk to these effective long-term C stores. The recognition of these coastal habitats  
398 for both their biodiversity and additional ecosystem functioning, including C sequestration  
399 and storage, represents an important emerging opportunity to designate and help create a new  
400 thinking in the establishment of marine protected areas. Taking into account the areal extent  
401 of fjords, their proximity to terrestrial sources and their longevity and stability, we suggest  
402 that fjordic sediments are the most effective systems for the long-term storage of OC in the  
403 UK and it is highly likely that fjords globally are just as effective as their mid-latitude  
404 equivalents at storing C.

## 405 **5. Conclusion**

406 The sediments of mid-latitude fjords hold a significant quantity of C which has largely been  
407 overlooked in global C budgets and which constitute a significant component of natural  
408 capital for Scotland and the UK. Our results indicate that the  $640.7 \pm 46$  Mt C held within the  
409 sediments of these fjords is of similar, if not greater, magnitude than most terrestrial C stores.  
410 Fjords cover a small area in comparison with terrestrial C stores, but the stability and  
411 longevity of these coastal stores means that fjords are a highly effective long-term repository  
412 of C, surpassing the Scottish peatlands which have been the focus of intense research for  
413 decades. In contrast with their terrestrial equivalents, the magnitude of the fjord sedimentary  
414 C stores combined with their long-term stability emphasises the significant role that fjords  
415 and the coastal ocean, more generally, play in the burial and storage of C globally. This  
416 highlights the need for stronger international effort to quantify coastal sedimentary C stores  
417 and account for the C sequestration and associated climate regulating services which these  
418 subtidal environments provide.

## 419 **Author Contribution**

420 Craig Smeaton and William E. N. Austin conceived the research and wrote the manuscript, to  
421 which all co-authors contributed data or provided input. Craig Smeaton conducted the  
422 research as part of his PhD at the University of St. Andrews, supervised by William E. N.  
423 Austin, Althea L. Davies and John A. Howe.

#### 424 **Acknowledgments**

425 This work was supported by the Natural Environment Research Council (grant number:  
426 NE/L501852/1) with additional support from the NERC Radiocarbon Facility (Allocation  
427 1934.1015). We thank, the British Geological Survey (Edinburgh and Keyworth) for  
428 providing access to seismic profiles and access to sediment samples (Loan Number: 237389).  
429 The crew and captain of RV Calanus for assisting in sample collection finically supported by  
430 the EU Framework V HOLSMEER project (EVK2-CT-2000-00060) and the EU FPVI  
431 Millennium project (contract number 017008). Further seismic profiles and the CALYPSO  
432 long core were acquired within the frame of the French ECLIPSE programme with additional  
433 financial support from NERC, SAMS and the University of St Andrews. The authors would  
434 like to thank Marion Dufresne's Captain J.-M. Lefevre, the Chief Operator Y. Balut (from  
435 IPEV). Additionally, we would like to thank Colin Abernethy and Richard Abel (Scottish  
436 Association of Marine Science) for laboratory support. [Finally we would like to thank two](#)  
437 [anonymous reviewers whose insightful comments improved this paper.](#)

438

439

440

441

442

443

444

445

446

447

448

449

450

451

452

453

454  
455  
456  
457  
458  
459  
460  
461  
462  
463  
464  
465  
466  
467  
468  
469  
470  
471  
472  
473  
474  
475  
476  
477  
478  
479  
480  
481  
482  
483  
484  
485  
486  
487  
488

## References

- Aitkenhead, M. J. and Coull, M. C.: Mapping soil carbon stocks across Scotland using a neural network model, *Geoderma*, 262, 187–198, doi:10.1016/j.geoderma.2015.08.034, 2016.
- Atamanchuk, D., Kononets, M., Thomas, P. J., Hovdenes, J., Tengberg, A. and Hall, P. O. J.: Continuous long-term observations of the carbonate system dynamics in the water column of a temperate fjord, *J. Mar. Syst.*, 148, 272–284, doi:10.1016/j.jmarsys.2015.03.002, 2015.
- Baltzer, A., Bates, R., Mokeddem, Z., Clet-Pellerin, M., Walter-Simonnet, a.-V., Bonnot-Courtois, C. and Austin, W. E. N.: Using seismic facies and pollen analyses to evaluate climatically driven change in a Scottish sea loch (fjord) over the last 20 ka, *Geol. Soc. London, Spec. Publ.*, 344(1), 355–369, doi:10.1144/SP344.24, 2010.
- Bauer, J. E. and Bianchi, T. S.: Dissolved Organic Carbon Cycling and Transformation, Elsevier Inc., *Treatise on Estuarine and Coastal Science*, 5, 7-762012.
- [Bianchi, T. S.: The role of terrestrially derived organic carbon in the coastal ocean: a changing paradigm and the priming effect., \*Proc. Natl. Acad. Sci. U. S. A.\*, 108\(49\), 19473–81, doi:10.1073/pnas.1017982108, 2011.](#)
- Bianchi, T. S., Schreiner, K. M., Smith, R. W., Burdige, D. J., Woodard, S. and Conley, D. J.: Redox Effects on Organic Matter Storage in Coastal Sediments During the Holocene : A Biomarker / Proxy Perspective, *Annu. Rev. Earth Planet. Sci.*, 44, 295–319, doi:10.1146/annurev-earth-060614-105417, 2016.
- Brazier, V., Whittington, G., Ballantyne, C.K.: Holocene debris cone evolution in glen etive Western Grampian Hhghlands, Scotland, *Earth Surface Processes and Lanscapes*,13, 525-531, 1988
- Burrows, M., Kamenos, N. and Hughes, D.: Assessment of carbon budgets and potential blue carbon stores in Scotland’s coastal and marine environment, , (7) [online] Available from: <http://eprints.gla.ac.uk/96572/>, 2014.
- Cage, A. G. and Austin, W. E. N.: Marine climate variability during the last millennium: The

489 Loch Sunart record, Scotland, UK, *Quat. Sci. Rev.*, 29(13-14), 1633–1647,  
 490 doi:10.1016/j.quascirev.2010.01.014, 2010.

491 Clark, C. D., Hughes, A. L. C., Greenwood, S. L., Jordan, C., and Petter, H.: Pattern and  
 492 timing of retreat of the last British-Irish Ice Sheet, *Quaternary Sci. Rev.*, 44, 112–146,  
 493 doi:10.1016/j.quascirev.2010.07.019, 2012.

494 Chapman, S. J., Bell, J., Donnelly, D. and Lilly, a.: Carbon stocks in Scottish peatlands, *Soil*  
 495 *Use Manag.*, 25(2), 105–112, doi:10.1111/j.1475-2743.2009.00219.x, 2009.

496 Cronin, J. R. & Tyler, I. D.: Organic carbon in a Scottish sea loch. In: Albaiges, J. (ed.)  
 497 *Analytical Techniques in Environmental Chemistry*. Pergamon Press, Oxford, 419–426, 1980

498 Cui, X., Bianchi, T. S., Savage, C. and Smith, R. W.: Organic carbon burial in fjords:  
 499 Terrestrial versus marine inputs, *Earth Planet. Sci. Lett.*, 451, 41–50,  
 500 doi:10.1016/j.epsl.2016.07.003, 2016.

501 Cummins, R., Donnelly, D., Nolan, A., Towers, W., Chapman, S., Grieve, I., and Birnie, R.  
 502 V.: Peat erosion and the management of peatland habitats. Scottish Natural Heritage  
 503 Commissioned Report No. 410, 2011.

504 Dadey, K. A., Janecek, T., and Klaus, A.: Dry bulk density: its use and determination,  
 505 *Proceedings of the Ocean Drilling Program, Scientific Results*, 126, 551–554, 1992.

506 Davies, G. M., Gray, A., Rein, G., and Legg, C. J.: Peat consumption and carbon loss due to  
 507 smouldering wildfire in a temperate peatland, *For. Ecol. Manage.*, 308, 169–177, 2013.

508 Dix, J. K. and Duck, R. W.: A high-resolution seismic stratigraphy from a Scottish sea loch  
 509 and its implications for Loch Lomond Stadial deglaciation, , 15, 645–656, 2000.

510 Duarte, C. M., Middelburg, J. J. and Caraco, N.: Major role of marine vegetation on the  
 511 oceanic carbon cycle, *Biogeosciences*, 2, 1–8, doi:10.5194/bgd-1-659-2004, 2005.

512 Edwards, A. and Sharples, F.: *Scottish Sea Lochs: A Catalogue*. Scottish Marine Biological  
 513 Association/Nature Conservancy Council, Oban, 1986.

514 Edwards, K. J. and Whittington, G.: Lateglacial palaeoenvironmental investigations at Wester  
 515 Cartmore Farm, Fife and their significance for patterns of vegetation and climate change in  
 516 east-central Scotland. *Review of Palaeobotany and Palynology* 159: 14–34, 2010

517 Forestry Commission.: Carbon in living woodland trees in Britain: A National Forestry  
 518 Inventory Report, 2015. Available online at:  
 519 [http://www.forestry.gov.uk/pdf/FCNFI113.pdf/\\$FILE/FCNFI113.pdf](http://www.forestry.gov.uk/pdf/FCNFI113.pdf/$FILE/FCNFI113.pdf)

520 Friedrich, J., Janssen, F., Aleynik, D., Bange, H. W., Boltacheva, N., Çagatay, M. N., Dale, A.  
 521 W., Etiope, G., Erdem, Z., Geraga, M., Gilli, A., Gomoiu, M. T., Hall, P. O. J., Hansson, D.,  
 522 He, Y., Holtappels, M., Kirf, M. K., Kononets, M., Konovalov, S., Lichtschlag, A.,  
 523 Livingstone, D. M., Marinaro, G., Mazlumyan, S., Naeher, S., North, R. P., Papatheodorou,  
 524 G., Pfannkuche, O., Prien, R., Rehder, G., Schubert, C. J., Soltwedel, T., Sommer, S., Stahl,

525 H., Stanev, E. V., Teaca, A., Tengberg, A., Waldmann, C., Wehrli, B., and Wenzhöfer, F.:  
 526 Investigating hypoxia in aquatic environments: Diverse approaches to addressing a complex  
 527 phenomenon, *Biogeo sciences*, 11, 1215–1259, doi:10.5194/bg-11-1215-2014, 2014.

528 Gillibrand, P. A., Cage, A. G. and Austin, W. E. N.: A preliminary investigation of basin  
 529 water response to climate forcing in a Scottish fjord: evaluating the influence of the NAO,  
 530 *Cont. Shelf Res.*, 25(5-6), 571–587, doi:10.1016/j.csr.2004.10.011, 2005.

531 Gillibrand, P.A., Cromey, C.J., Black, K.D., Inall, M.E., Gontarek, S.J.: Identifying the risk  
 532 of deoxygenation in Scottish sea lochs with isolated deep water, *Scottish Aquaculture*  
 533 *Research Forum*, SARF 07 Report, 2006.

534 Golledge, N. R.: Glaciation of Scotland during the Younger Dryas stadial : a review, *J. Quat.*  
 535 *Sci.*, 25(4), 550–566, doi:10.1002/jqs.1319, 2010.

536 Van Der Heijden, L. H. and Kamenos, N. A.: Reviews and syntheses: Calculating the global  
 537 contribution of coralline algae to total carbon burial, *Biogeosciences*, 12(21), 6429–6441,  
 538 doi:10.5194/bg-12-6429-2015, 2015.

539 Harris, D., Horwath, W.R., van Kessel, C.: Acid fumigation of soils to remove carbonates  
 540 prior to total organic carbon or carbon-13 isotopic analysis. *Soil Sci. Soc. Am. J.* 65, 1853–  
 541 1856, 2001.

542 Henrys, P.A.; Keith, A.; Wood, C.M. : Model estimates of aboveground carbon for Great  
 543 Britain. NERC Environmental Information Data Centre, 2016. Available online at:  
 544 <https://doi.org/10.5285/9be652e7-d5ce-44c1-a5fc-8349f76f5f5c>.

545 Howe, J. A., Shimmield, T., Austin, W. E. N. and Longva, O.: Post-glacial depositional  
 546 environments in a mid-high latitude glacially-overdeepened sea loch , inner Loch Etive ,  
 547 western Scotland, , 185, 417–433, 2002.

548 Jackson, R.B., Banner, J.L., Jobbagy, E.G., Pockman, W.T. and Wall, D.H.: Ecosystem  
 549 carbon loss with woody plant invasion of grasslands. *Nature* 418: 623-626, 2012.

550 Khanna, N., Godbold, J. A., Austin, W. E. N. and Paterson, D. M.: The impact of ocean  
 551 acidification on the functional morphology of foraminifera, *PLoS One*, 8(12), 10–13,  
 552 doi:10.1371/journal.pone.0083118, 2013.

553 Lambeck, K.: Glacial rebound of the British Isles II. A high resolution high precision model,  
 554 *Geophys. J. Int.*, 115, 960-990, 1993.

555 Loh, P. S., Miller, A. E. J., Reeves, A. D., Harvey, S. M., Overnell, J. and Systems, E.:  
 556 Assessing the biodegradability of terrestrially-derived organic matter in Scottish sea loch  
 557 sediments, , 811–823, 2008.

558 Mastrandrea, M.D., Field, C.B., Stocker, T.F., Edenhofer, O., Ebi, K.L. , Frame, D.J. Held,  
 559 H., Kriegler, E., Mach, K.J., Matschoss, P.R., Plattner, G.K, Yohe, G.W., and Zwiers, F.W.:  
 560 Guidance Note for Lead Authors of the IPCC Fifth Assessment Report on Consistent  
 561 Treatment of Uncertainties. Intergovernmental Panel on Climate Change (IPCC), 2010.

[McIntyre, K. L. and Howe, J. A.: Scottish west coast fjords since the last glaciation: a review. Geological Society, London, Special Publications, 344, 305-329, 2010.](#)

[Middelburg, J. J., Vlug, T., Jaco, F. and van der Nat, W. .: Organic matter mineralization in marine systems, Glob. Planet. Change, 8, 47–58, 1993.](#)

Middelburg, J. J. and Levin, L. A.: Coastal hypoxia and sediment biogeochemistry, , 1273–1293, 2009.

Mokeddem, Z., Goubert, E., Lartaud, F. and Labourdette, N.: The “ Turritella Layer ”: A Potential Proxy of a Drastic Holocene Environmental Change on the North – East Atlantic Coast, , 3–21, doi:10.1007/978-94-017-9260-8, 2015.

Nørgaard-Pedersen, N., Austin, W. E. N., Howe, J. a. and Shimmield, T.: The Holocene record of Loch Etive, western Scotland: Influence of catchment and relative sea level changes, Mar. Geol., 228(1-4), 55–71, doi:10.1016/j.margeo.2006.01.001, 2006.

Röhr, M. E., Boström, C., Canal-Verges, P. and Holmer, M.: Blue carbon stocks in Baltic Sea eelgrass (*Zostera marina*) meadows, Biogeosciences, 13(22), 6139–6153, doi:10.5194/bg-13-6139-2016, 2016.

Russell, M., Robinson, C.D., Webster, L., Walsham, P., Phillips, L., Dalgarno, E., Rose, M., Watson, D., Scurfield, J., Avery, D.J., Devalla, S., Gubbins, M., Davies, I.M., and Moffat, C.F.: Persistent organic pollutants and trace metals in sediments close to Scottish marine fish farm, Scottish marine and freshwater science volume 1 no 16, 2010, ISSN:2043-7722.

Smeaton, C., Austin, W. E. N., Davies, A. L., Baltzer, A. and Abell, R. E.: A Sedimentary Carbon Inventory for a Scottish Sea Loch ( Fjord ): An Integrated Geochemical and Geophysical, , (June), 1–37, doi:10.5194/bg-2016-245, 2016.

[Smeaton, C. and Austin, W. E. N.: Sources, Sinks and Subsidies: Terrestrial Carbon Storage in the Coastal Ocean, J. Geophys. Res. Biogeosciences, 2017.](#)

[Smeaton, C and Austin, W.E.N.: Sources, Sinks and Subsidies: Terrestrial Carbon Storage in the Coastal Ocean, Journal of Geophysical Research: Biogeosciences, 2017 — In review](#)

Smith, R. W., Bianchi, T. S., Allison, M., Savage, C. and Galy, V.: High rates of organic carbon burial in fjord sediments globally, Nature Geoscience , doi:10.1038/NGEO2421, 2015.

Stoker, M. and Bradwell, T. Neotectonic deformation in a scottish fjord, Loch Broom, NW Scotland, Scottish Journal of Geology, 45 (2), pp. 107-116, 2009.

Stoker, M., Wilson, C.R., Howe J.A., Bradwell, T., and Long, D. : Paraglacial slope instability in Scottish fjords: Examples from Little Loch Broom, NW Scotland, Geological Society Special Publications, 344, pp. 225-242, 2010

Syvitski, J. P. M. and Shaw, J.: Sedimentology and Geomorphology of Fjords, Geomorphology and Sedimentology of Estuaries, Dev. Sedimentology., 53, 113–178, 1995.

Syvitski, J. P. M., Burrell, D. C., and Skei, J. M.: Fjords, Processes and Products, Springer-Verlag New York, 1987.



599 Vanguelova, E. I., Nisbet, T. R., Moffat, A. J., Broadmeadow, S., Sanders, T. G. M. and  
600 Morison, J. I. L.: A new evaluation of carbon stocks in British forest soils, *Soil Use Manag.*,  
601 29(2), 169–181, doi:10.1111/sum.12025, 2013.

602 Verardo, D. J., Froelich, P. N., and McIntyre, A.: Determination of organic carbon and  
603 nitrogen in marine sediments using the Carlo Erba NA-1500 Analyzer, *Deep-Sea Res.*, 37,  
604 157–165, 1990.

605 Webster, L., Fryer, R. J., Megginson, C., Dalgarno, E. J., McIntosh, A. D., Moffat, C. F.,  
606 Road, V. and Ab, U. K.: The polycyclic aromatic hydrocarbon and geochemical biomarker  
607 composition of sediments from sea lochs on the west coast of Scotland, , 219–228, 2004.

608 Woulds, C., Cowie, G. L., Levin, L. A., Andersson, J. H., Middelburg, J. J., Vandewiele, S.,  
609 Lamont, P. A., Larkin, K. E., Gooday, A. J., Schumacher, S., Whitcraft, C. and Jeffreys, R.  
610 M.: Oxygen as a control on seafloor biological communities and their roles in sedimentary  
611 carbon cycling, , 52(4), 1–13, 2007.

612 Woulds, C., Bouillon, S., Cowie, G. L., Drake, E., Middelburg, J. J. and Witte, U.: Patterns of  
613 carbon processing at the seafloor: The role of faunal and microbial communities in  
614 moderating carbon flows, *Biogeosciences*, 13(15), 4343–4357, doi:10.5194/bg-13-4343-2016,  
615 2016.

616

## 617 **Figure Captions**

618 **Figure 1.** Map illustrating the location of Scotland's 111 fjords and the available data.  
619 Additionally, detailed maps present the sampling locations within **(D)** Loch Broom, **(E)** Little  
620 Loch Broom, **(F)** Loch Sunart (Smeaton et al., 2016), **(G)** Loch Creran (Loh et al., 2008) and  
621 **(H)** Loch Etive.

622 **Figure 2.** Output from the k-means analysis showing the spatial distribution of the four  
623 different groups of fjords.

624 **Figure 3.** Matrix depicting the relationship between data availability, similarity to modelled  
625 fjords and confidence level. Adapted from IPCC 5th Assessment Report (Mastrandrea et al.  
626 2010).

627 **Figure 4.** Boxplots illustrating the **(A)** dry bulk density and **(B)** carbon content (%) compiled  
628 from the sediment cores extracted from the five fjords central to this research. Data for the  
629 glacially derived sediments collected from Loch Sunart (MD04-2833) are also presented.

630 **Figure 5.** Frequency distribution of sedimentary TC stock estimates for the Scotland's 111  
631 fjords.

632 **Figure 6.** Comparison of the Scotland's national fjordic sedimentary C store to other  
633 national inventories of C. **(A)** Carbon stocks (Mt) **(B)** Area of store (km<sup>2</sup>) **(C)** Effective  
634 carbon storage (Mt C km<sup>-2</sup>) for the 111 fjords and **(D)** Effective carbon storage (Mt C km<sup>-2</sup>)  
635 for the other (non-fjord) national C stores of Scotland.

636

637  
638  
639  
640  
641  
642  
643  
644  
645  
646  
647  
648  
649  
650  
651  
652  
653  
654  
655  
656  
657  
658  
659  
660  
661  
662  
663

**Table 1.** Key physical characteristics ([Edwards and Sharples, 1986](#)) of each of the five fjords selected to produce detailed estimates of sedimentary C stocks.

| Fjord             | Length<br>(km) | Area<br>(km <sup>2</sup> ) | Mean Depth<br>(m) | Max Depth<br>(m) | Catchment Size<br>(km <sup>2</sup> ) | Fresh/Tidal<br>Ratio |
|-------------------|----------------|----------------------------|-------------------|------------------|--------------------------------------|----------------------|
| Loch Etive        | 29.5           | 27.7                       | 33.9              | 139              | 1350                                 | 120.4                |
| Loch Creran       | 12.8           | 13.3                       | 13.4              | 49               | 164                                  | 12.5                 |
| Loch Broom        | 14.7           | 16.8                       | 27.3              | 87               | 353                                  | 14                   |
| Little Loch Broom | 12.7           | 20.4                       | 41.7              | 110              | 167                                  | 5.5                  |
| Loch Sunart       | 30.7           | 47.3                       | 38.9              | 124              | 299                                  | 5.3                  |

664  
665  
666  
667  
668  
669  
670  
671  
672  
673  
674  
675  
676  
677  
  
678  
679  
680  
681  
682  
683  
684  
685

**Table 2.** Detailed sedimentary C stocks presented as total carbon (TC), organic carbon (OC) and inorganic carbon (IC) held within postglacial (PG) and glacial (G) sediment of the fjords. Additionally, we list the  $C_{\text{eff}}$  for each fjord as a measure of how effectively the sediment stores C.

| Fjord             |    | TC<br>(Mt)        | OC<br>(Mt)        | IC<br>(Mt)        | $C_{\text{eff}}$<br>(Mt C km <sup>-2</sup> ) | $OC_{\text{eff}}$<br>(Mt OC km <sup>-2</sup> ) | $IC_{\text{eff}}$<br>(Mt IC km <sup>-2</sup> ) |
|-------------------|----|-------------------|-------------------|-------------------|----------------------------------------------|------------------------------------------------|------------------------------------------------|
| Loch Etive        |    | <b>21.1 ± 0.3</b> | <b>12.6 ± 0.3</b> | <b>8.6 ± 0.3</b>  | <b>0.766</b>                                 | <b>0.455</b>                                   | <b>0.311</b>                                   |
|                   | PG | 17.7 ± 0.4        | 11.5 ± 0.4        | 6.2 ± 0.3         | 0.639                                        | 0.415                                          | 0.224                                          |
|                   | G  | 3.5 ± 0.2         | 1.1 ± 0.1         | 2.4 ± 0.2         | 0.127                                        | 0.040                                          | 0.087                                          |
| Loch Creran       |    | <b>4.8 ± 0.7</b>  | <b>3 ± 0.5</b>    | <b>1.8 ± 0.9</b>  | <b>0.361</b>                                 | <b>0.225</b>                                   | <b>0.136</b>                                   |
|                   | PG | 3.5 ± 0.6         | 2.6 ± 0.7         | 0.9 ± 0.4         | 0.268                                        | 0.195                                          | 0.068                                          |
|                   | G  | 1.3 ± 0.9         | 0.4 ± 0.1         | 0.9 ± 1.2         | 0.098                                        | 0.030                                          | 0.068                                          |
| Loch Broom        |    | <b>6.8 ± 0.4</b>  | <b>2.9 ± 0.4</b>  | <b>3.9 ± 0.4</b>  | <b>0.405</b>                                 | <b>0.173</b>                                   | <b>0.232</b>                                   |
|                   | PG | 5.1 ± 0.5         | 2.4 ± 0.5         | 2.7 ± 0.4         | 0.304                                        | 0.143                                          | 0.161                                          |
|                   | G  | 1.7 ± 0.3         | 0.5 ± 0.2         | 1.2 ± 0.3         | 0.101                                        | 0.030                                          | 0.071                                          |
| Little Loch Broom |    | <b>7 ± 0.5</b>    | <b>3.5 ± 0.5</b>  | <b>3.5 ± 0.6</b>  | <b>0.344</b>                                 | <b>0.171</b>                                   | <b>0.173</b>                                   |
|                   | PG | 3 ± 0.7           | 1.6 ± 0.6         | 1.4 ± 0.8         | 0.148                                        | 0.078                                          | 0.070                                          |
|                   | G  | 4 ± 0.3           | 1.9 ± 0.2         | 2.1 ± 0.4         | 0.196                                        | 0.093                                          | 0.103                                          |
| Loch Sunart       |    | <b>26.9 ± 0.5</b> | <b>11.5 ± 0.2</b> | <b>15.0 ± 0.4</b> | <b>0.560</b>                                 | <b>0.243</b>                                   | <b>0.317</b>                                   |
|                   | PG | 19.9 ± 0.3        | 9.4 ± 0.2         | 10.1 ± 0.2        | 0.412                                        | 0.199                                          | 0.213                                          |
|                   | G  | 7.0 ± 0.8         | 2.1 ± 0.3         | 4.9 ± 0.6         | 0.148                                        | 0.044                                          | 0.104                                          |

686  
687  
688  
689  
690  
691  
692  
693  
694  
695  
696  
697  
  
698  
699  
700  
701  
702  
703  
704  
705  
706  
707  
708  
709  
710  
711  
712  
713

**Table 3.** Total C stored in the sediment of Scotland’s 111 fjords further broken down into the quantities of OC and IC stored in the postglacial and glacial sediments.

|              | TC<br>(Mt)        | OC<br>(Mt)        | IC<br>(Mt)        |
|--------------|-------------------|-------------------|-------------------|
| Postglacial  | 467.1 ± 65        | 252.4 ± 62        | 214.7 ± 85        |
| Glacial      | 173.6 ± 18        | 43.2 ± 12         | 130.6 ± 22        |
| <b>Total</b> | <b>640.7 ± 46</b> | <b>295.6 ± 52</b> | <b>345.1 ± 39</b> |

714  
715  
716  
717  
718  
719  
720  
721  
722  
723  
724  
725  
726  
727  
728  
729  
730  
731

**Table.4.** Details of the fourteen fjords that disproportionately contribute to Scotland’s Fjordic Sedimentary C stock.

| <b>Fjord</b>                | <b>TC<br/>(Mt)</b> | <b>% of Scotland’s Total of<br/>Fjordic Sedimentary C Stock</b> |
|-----------------------------|--------------------|-----------------------------------------------------------------|
| Loch Fyne                   | 99.70              | 15.56                                                           |
| Loch Linnhe (Lower)         | 92.28              | 14.40                                                           |
| Loch Torridon               | 30.82              | 4.81                                                            |
| Loch Linnhe (upper) and Eil | 27.82              | 4.34                                                            |
| Loch Sunart                 | 26.50              | 4.14                                                            |
| Loch Ewe                    | 21.82              | 3.41                                                            |
| Loch Etive                  | 21.11              | 3.29                                                            |
| Long Clyde                  | 16.60              | 2.59                                                            |
| Loch Hourn                  | 15.41              | 2.41                                                            |
| Loch Ryan                   | 14.35              | 2.24                                                            |
| Loch na Keal                | 14.29              | 2.23                                                            |
| Loch Nevis                  | 13.08              | 2.04                                                            |
| Loch Scridian               | 12.01              | 1.87                                                            |
| Loch Carron                 | 10.52              | 1.64                                                            |

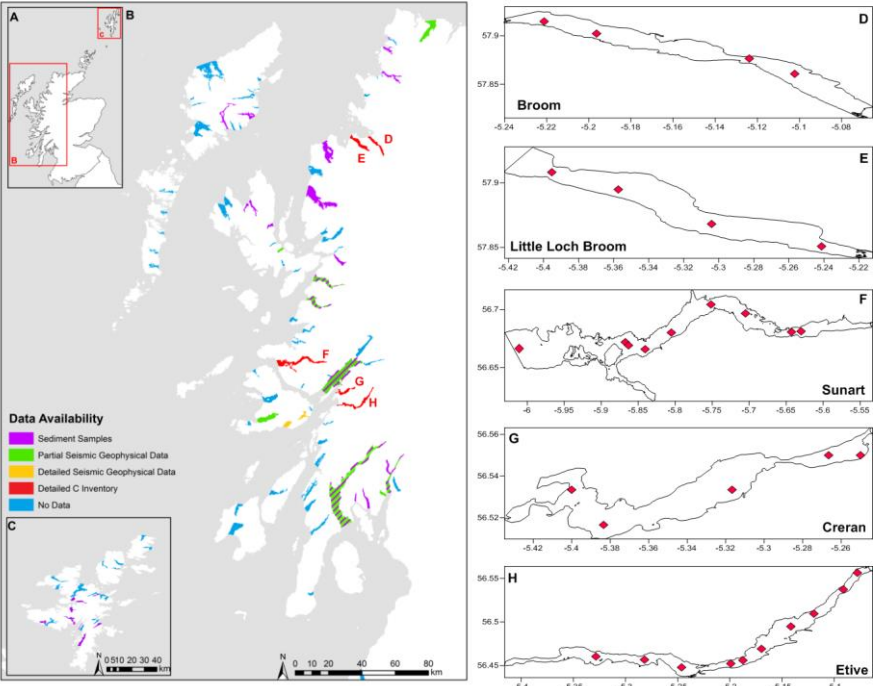

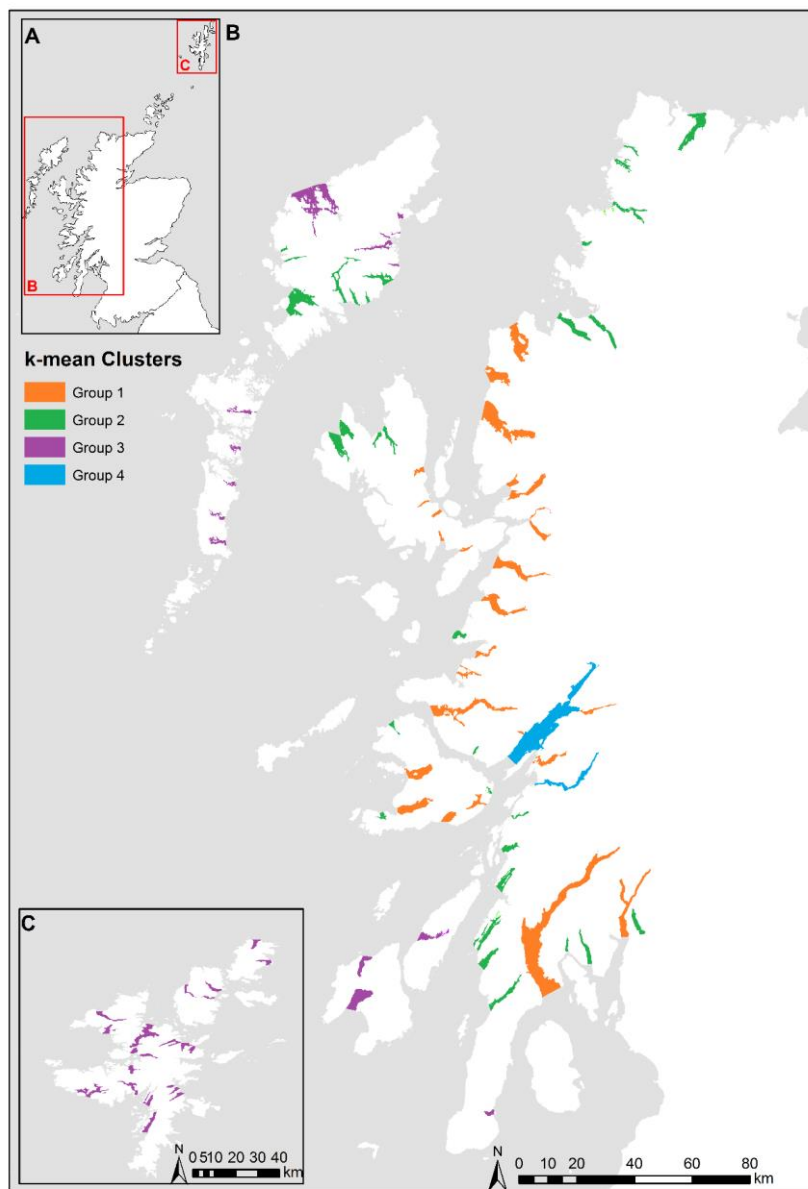

733

734

735

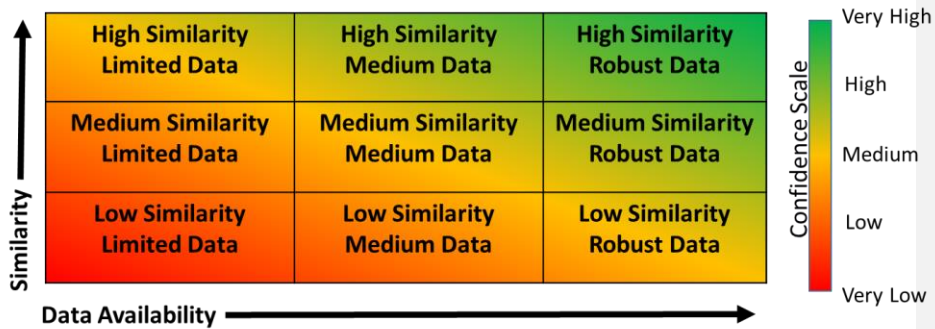

736  
737  
738  
739  
740  
741  
742  
743  
744  
745  
746  
747  
748  
749  
750  
751  
752  
753  
754  
755  
756  
757  
758



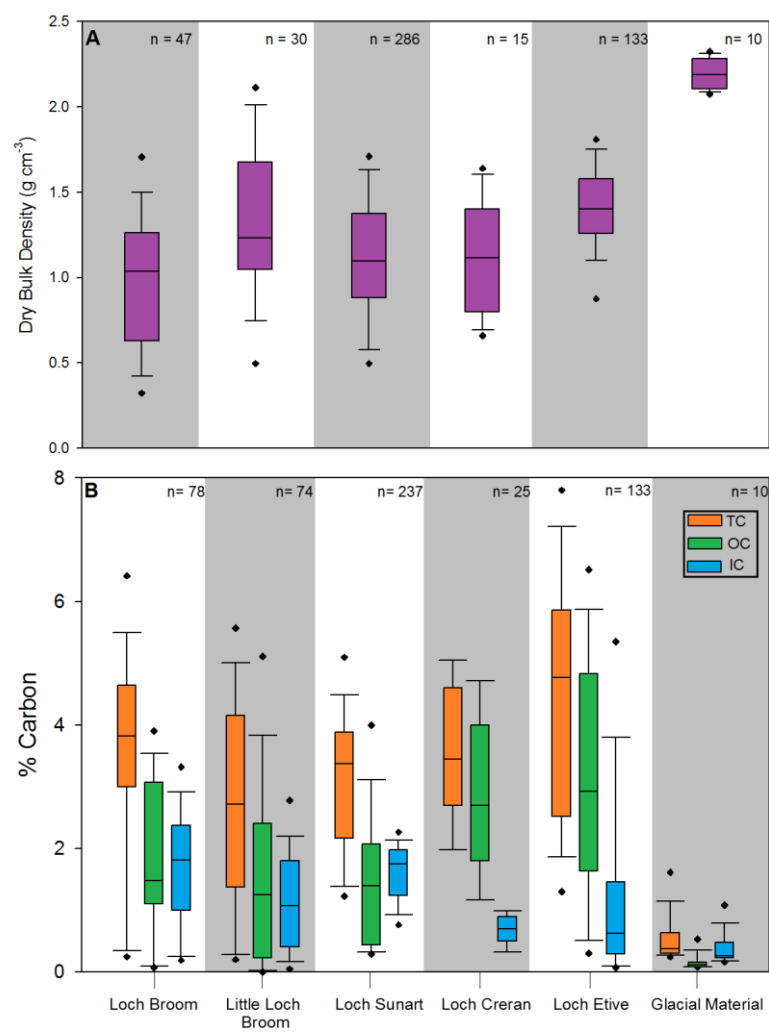

759

760

761

762

763

764

765

766  
767  
768

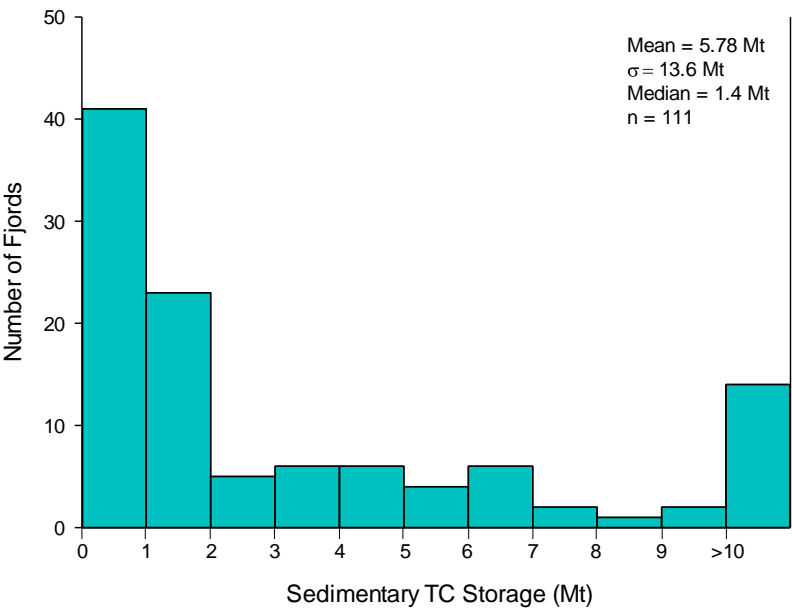

769  
770  
771  
772  
773  
774  
775  
776  
777  
778  
779

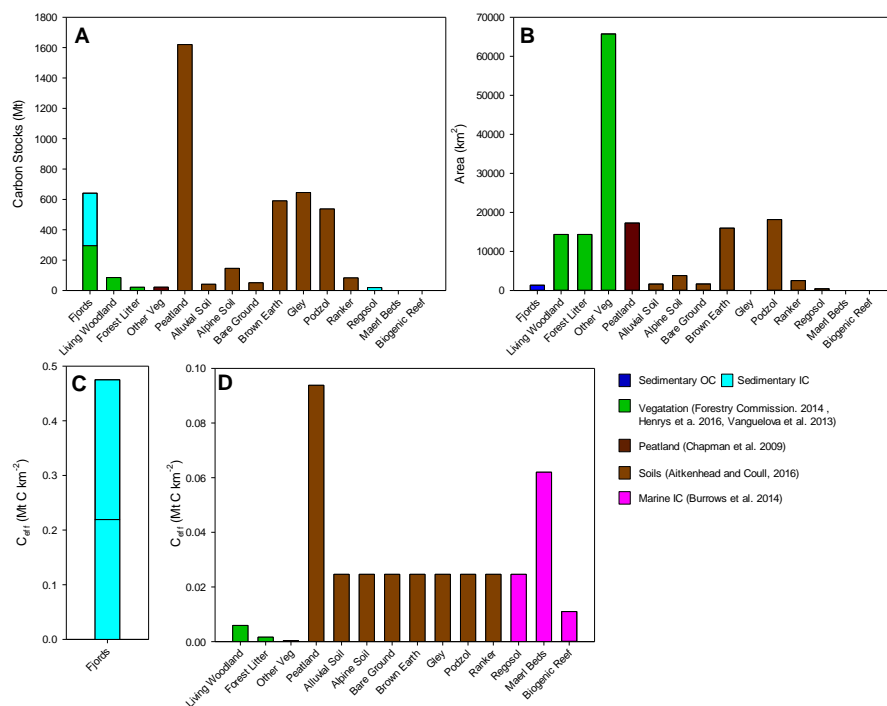

Field Code Changed
